# Supplementary material for: Construction of a robust pillared-layer framework based on the rare paddlewheel subunit [MnII2(μ-O2CR)4L2]: synthesis, crystal structure and magnetic properties
Source: Royal Society of Chemistry journal article supplement (doi:10.1039/c5dt02354h), 2015-01-01
Supplement: c5dt02354h1.pdf [file c5dt02354h1.pdf]

**Construction of a robust pillared-layer framework based on the rare paddlewheel subunit  $[\text{Mn}^{\text{II}}_2(\mu\text{-O}_2\text{CR})_4\text{L}_2]$ : synthesis, crystal structure and magnetic properties†**

Vijay Gupta<sup>#a</sup>, Sadhika Khullar<sup>#b</sup>, Sandeep Kumar<sup>a</sup> and Sanjay K. Mandal<sup>\*a</sup>

<sup>a</sup>*Department of Chemical Sciences, Indian Institute of Science Education and Research, Mohali, Sector 81, Manauli PO, S.A.S. Nagar, Mohali (Punjab) 140306, INDIA*

<sup>b</sup>*Department of Chemistry, DAV University, Jalandhar, Punjab 144001, INDIA*

<sup>#</sup>These authors contributed equally to this work.

## Electronic Supplementary Information

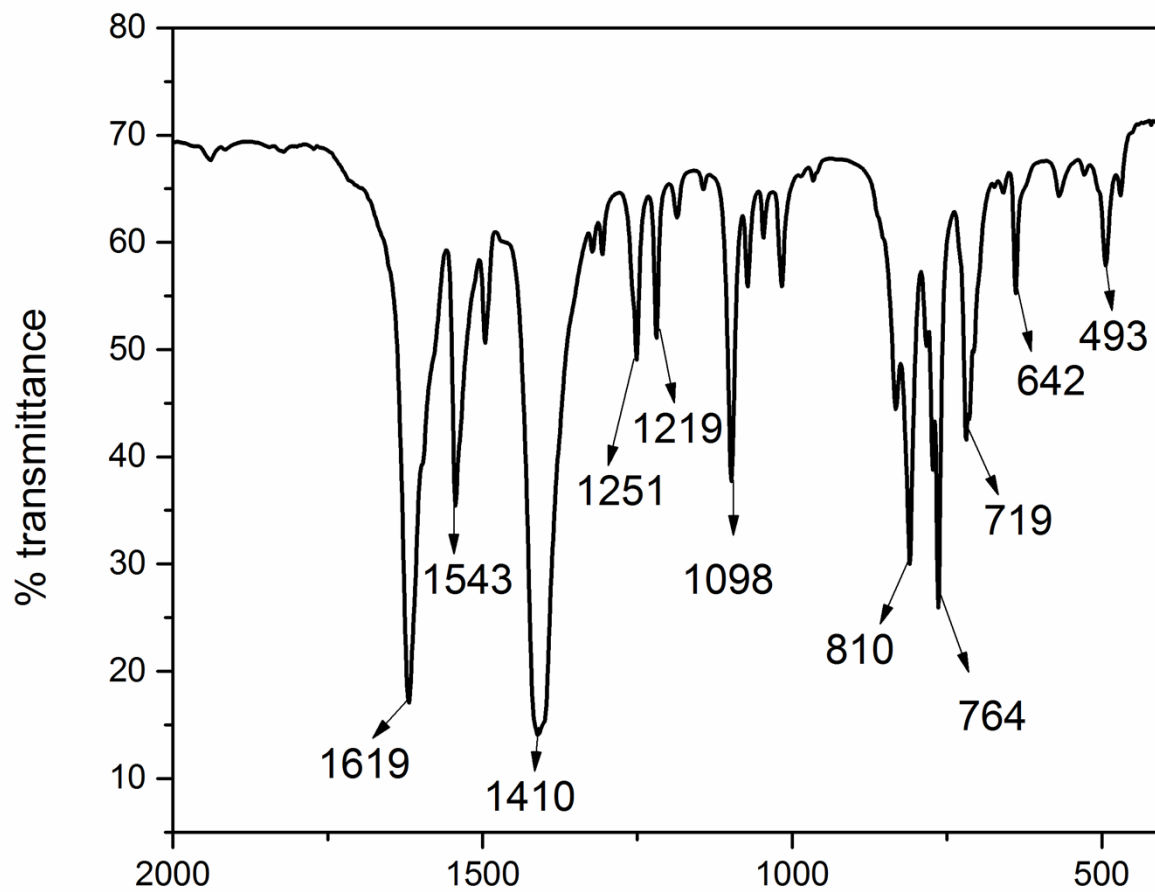

Fig S1. FTIR spectrum of 1.

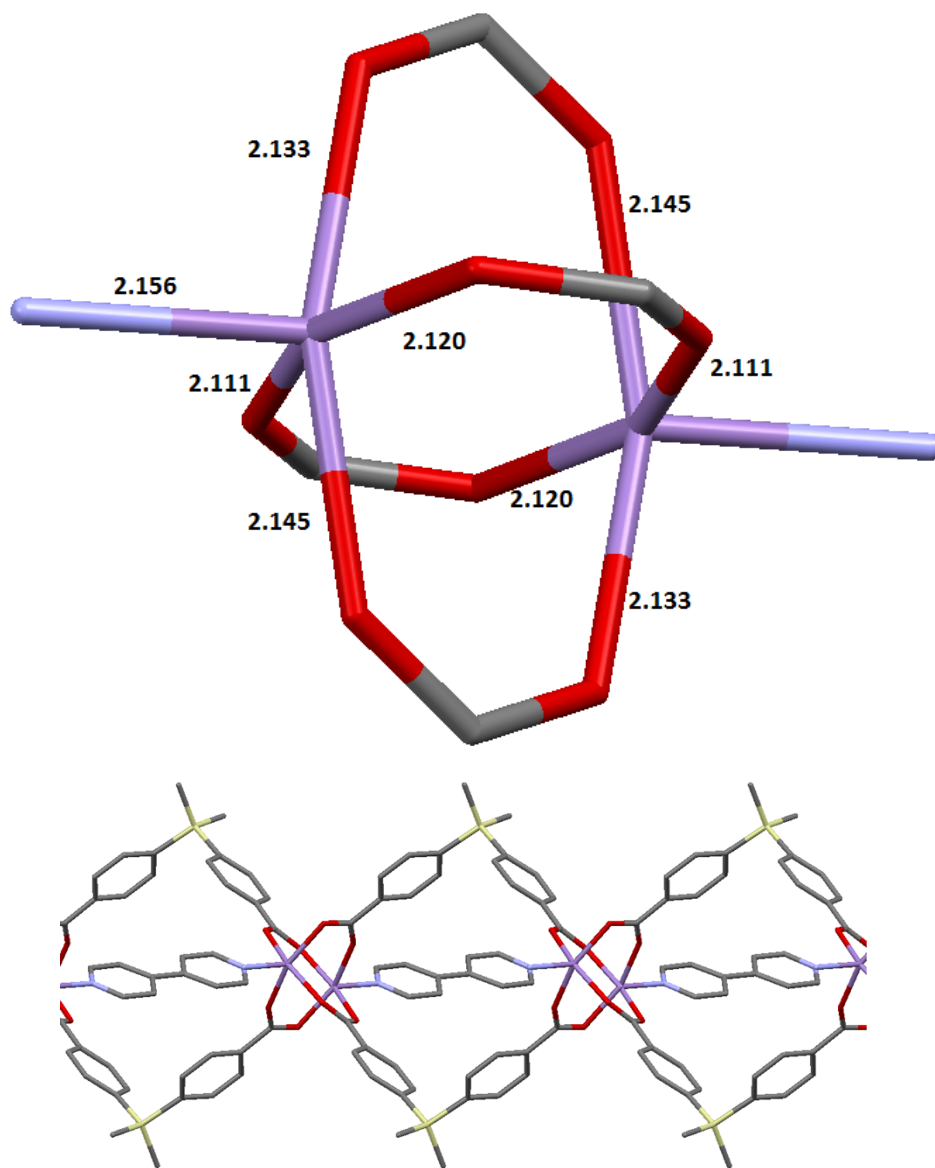

Fig S2. A view of the dinuclear subunit in **1** with structural parameters.

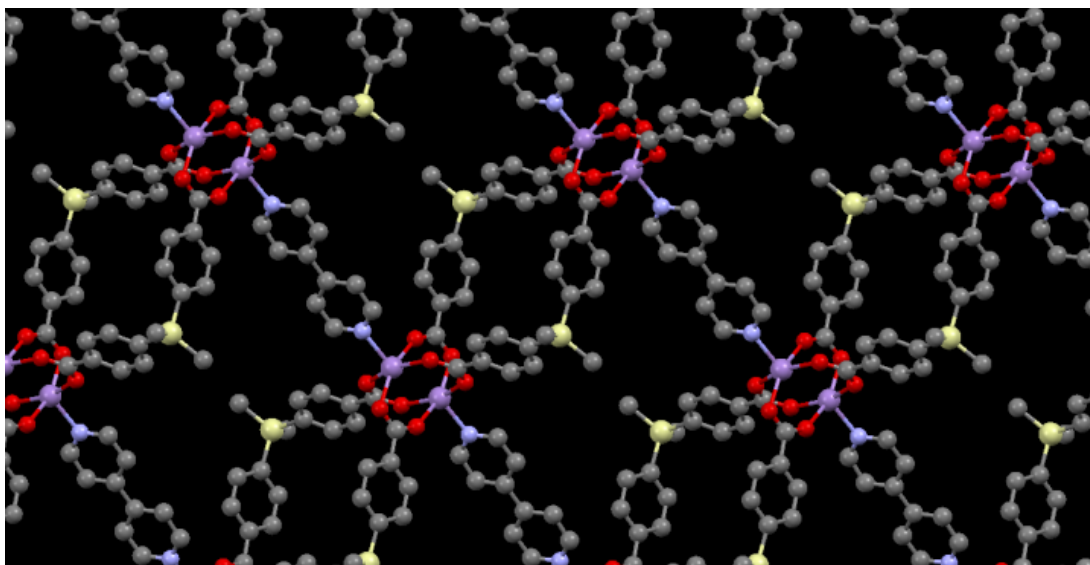

Fig S3. Another view of **1** showing the orientations of dimetal subunits and the dicarboxylate linkers that connect such subunits.

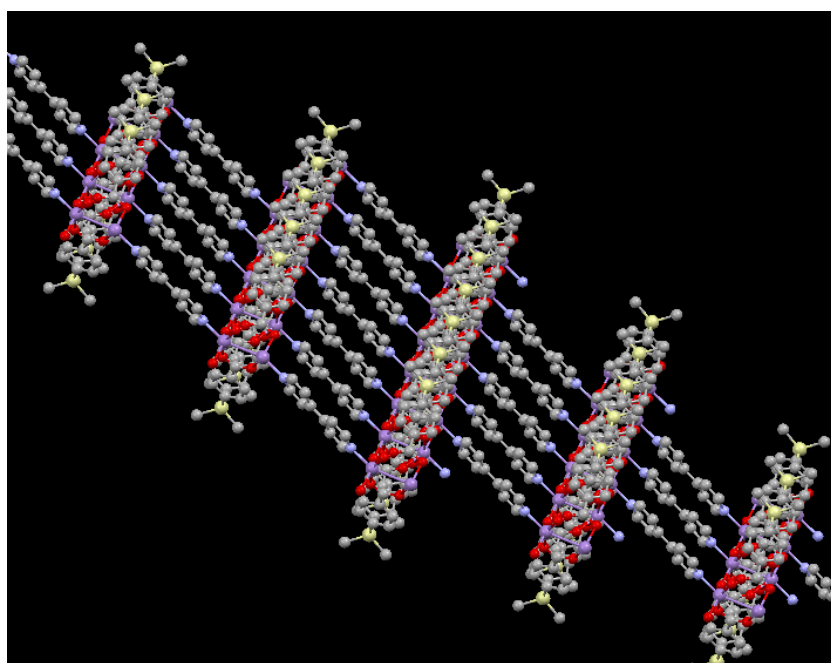

Fig S4. A view of **1** with 4,4'-bpy pillars connecting the paddle-wheel subunits.

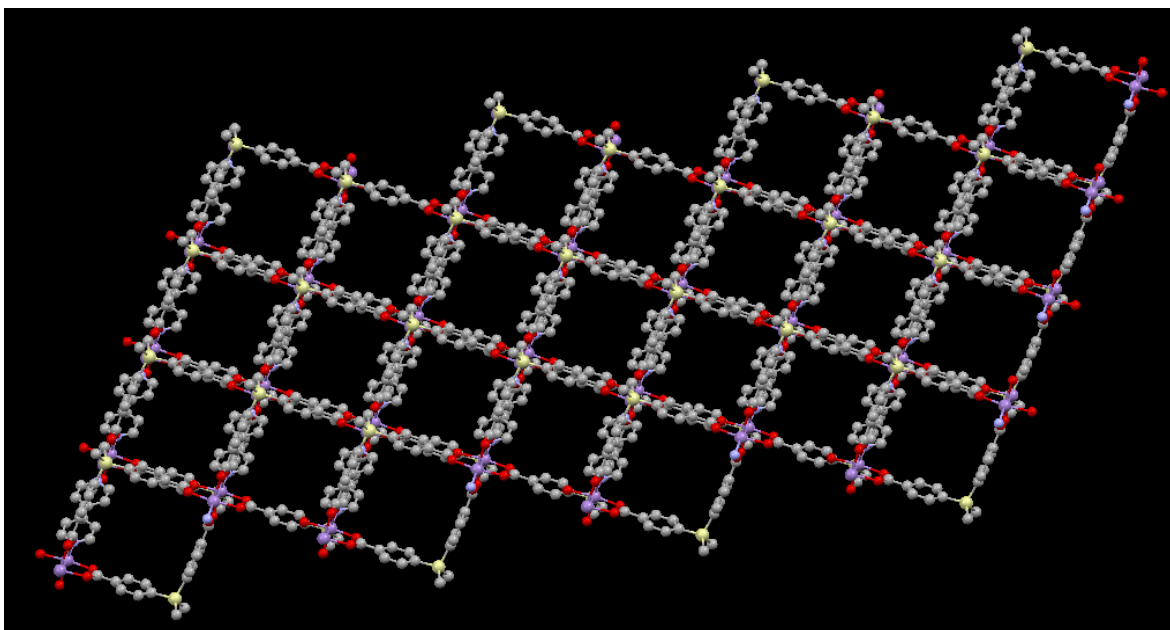

Fig S5. A square-grid view of 1.

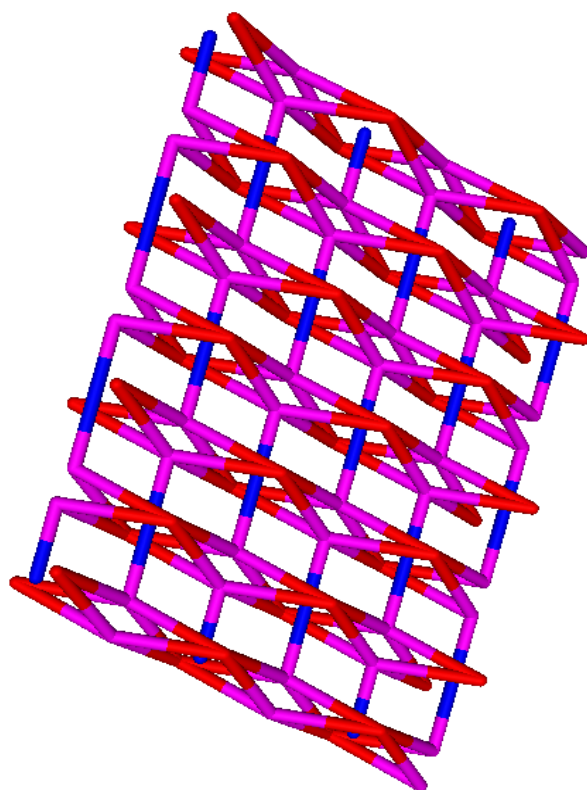

Fig S6. A topological view of 1.

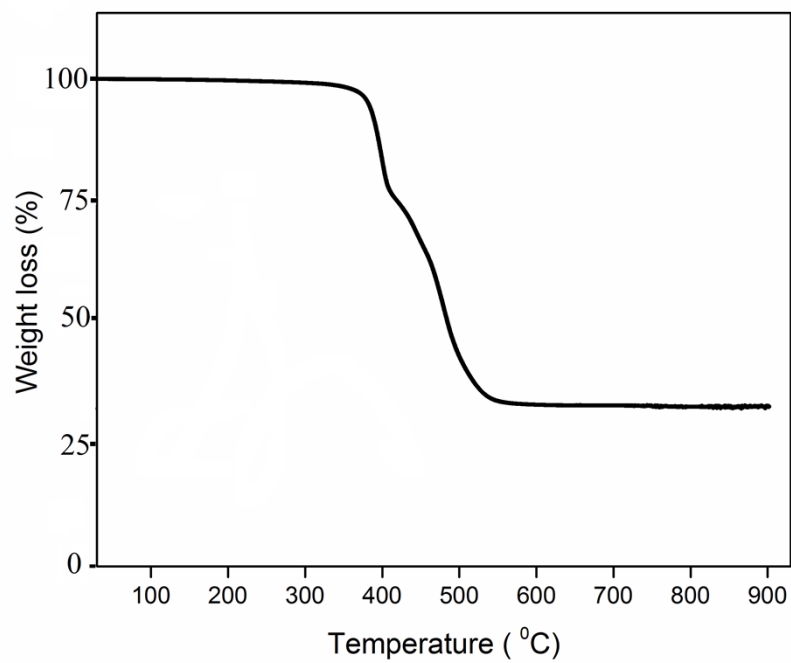

Fig S7. TGA scan of **1**.

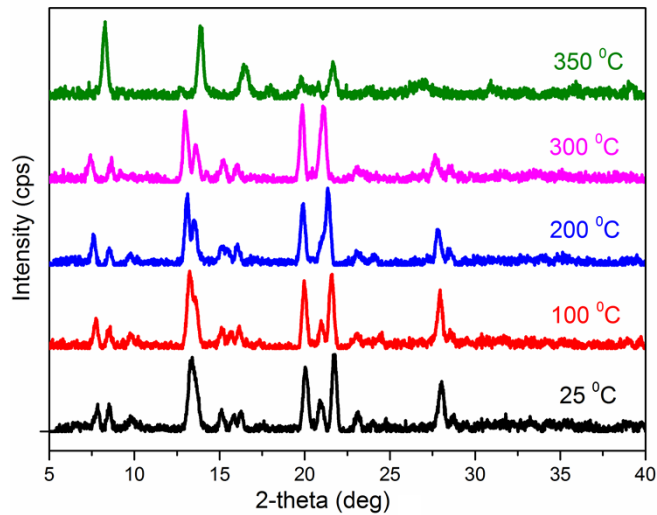

Fig S8. Variable temperature powder diffraction patterns of **1** indicating its thermal stability.

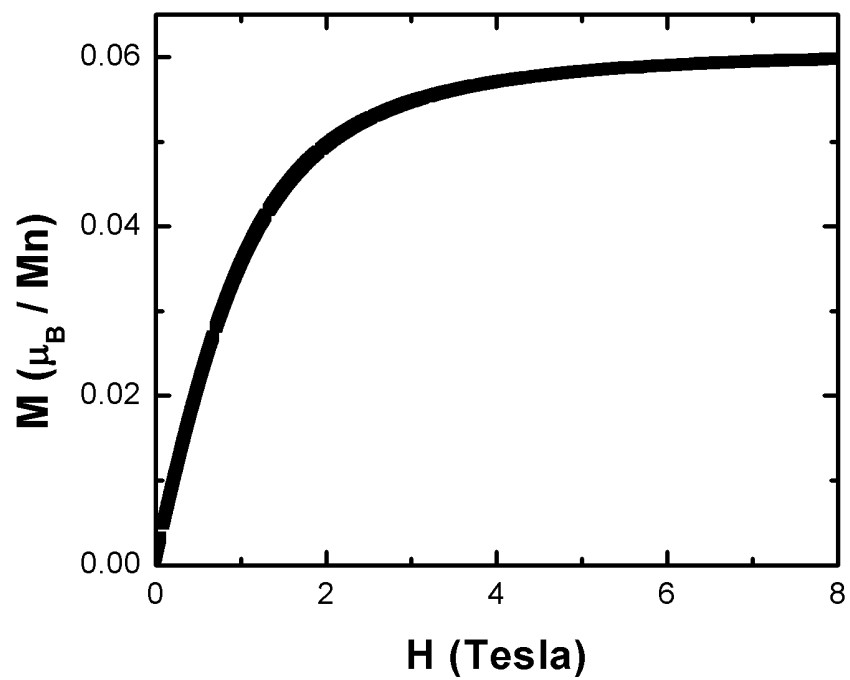

Fig S9. Magnetization  $M$  per Mn(II) ion versus field  $H$  at 2 K for **1**.

Table S1. Selected bond distances (Å) and angles (degree) for **1**.

at 100 K

|            |          |            |          |            |          |
|------------|----------|------------|----------|------------|----------|
| Mn1-O2     | 2.113(7) | Mn1-O4     | 2.145(6) | Mn1-O3     | 2.110(7) |
| Mn1-O1     | 2.149(7) | Mn1-N1     | 2.163(8) | Mn1-Mn1    | 2.989(4) |
| O3-Mn1-O2  | 159.8(3) | O3-Mn1-O1  | 85.8(3)  | O1-Mn1-O2  | 86.4(3)  |
| O2-Mn1-O4  | 87.5(3)  | O4-Mn1-O3  | 92.8(3)  | O1-Mn1-O4  | 158.1(3) |
| O3-Mn1-N1  | 100.4(3) | O2-Mn1-N1  | 98.5(3)  | O1-Mn1-N1  | 92.1(3)  |
| O4-Mn1-N1  | 109.6(3) | O2-Mn1-Mn1 | 77.6(2)  | O3-Mn1-Mn1 | 82.3(2)  |
| O1-Mn1-Mn1 | 61.8(2)  | O4-Mn1-Mn1 | 96.3(3)  | N1-Mn1-Mn1 | 153.7(2) |

at 296 K

|            |           |            |           |            |           |
|------------|-----------|------------|-----------|------------|-----------|
| Mn1-O3     | 2.111(4)  | Mn1-O4     | 2.134(4)  | Mn1-O2     | 2.145(5)  |
| Mn1-O1     | 2.121(4)  | Mn1-N1     | 2.155(5)  | Mn1-Mn1    | 3.005(2)  |
| O3-Mn1-O1  | 158.9(2)  | O3-Mn1-O2  | 85.6(2)   | O1-Mn1-O2  | 85.89(18) |
| O3-Mn1-O4  | 88.06(18) | O4-Mn1-O1  | 92.45(18) | O2-Mn1-O4  | 157.4(2)  |
| O3-Mn1-N1  | 99.11(19) | O1-Mn1-N1  | 100.6(2)  | O2-Mn1-N1  | 93.3(2)   |
| O4-Mn1-N1  | 109.1(2)  | O3-Mn1-Mn1 | 77.22(13) | O1-Mn1-Mn1 | 81.69(13) |
| O2-Mn1-Mn1 | 63.37(15) | O4-Mn1-Mn1 | 94.06(15) | N1-Mn1-Mn1 | 156.5(2)  |
